# Supplementary material for: Role of Electrostatic Interactions on Supramolecular Organization in Calf-Thymus DNA Solutions under Flow
Source: PubMed Central journal article supplement (PMC6290628; doi:10.3390/polym10111204), 2018-10-28
Supplement: polymers-10-01204-s001.pdf [file polymers-10-01204-s001.pdf]

*Article*

# **Role of electrostatic interactions on supramolecular organization in calf-thymus DNA solutions under flow**

**L. Mónica Bravo-Anaya<sup>1,2</sup>, Denis C. D. Roux<sup>1</sup>, J. Félix Armando Soltero Martínez<sup>2</sup>, Francisco Carvajal Ramos<sup>3</sup>, Frédéric Pignon<sup>1</sup>, Oonagh Mannix<sup>4</sup>, Marguerite Rinaudo<sup>\*5</sup>**

Received: date; Accepted: date; Published: date  
Academic Editor: name

<sup>1</sup> University Grenoble Alpes, CNRS, Grenoble INP, LRP, F-38000 Grenoble (France);

monik\_ayanami@hotmail.com, Denis.Roux@univ-grenoble-alpes.fr, frederic.pignon@univ-grenoble-alpes.fr

<sup>2</sup> Universidad de Guadalajara, Departamento de Ingeniería Química. Blvd. M. García Barragán #1451, C.P. 44430, Guadalajara, Jalisco (México); jfasm@hotmail.com

<sup>3</sup> Universidad de Guadalajara, CUTonalá, Departamento de Ingenierías, Nuevo Periférico #555 Ejido San José Tatepozco, C.P. 45425, Tonalá, Jalisco (México); iq\_fcr@yahoo.com.mx

<sup>4</sup> European Synchrotron Radiation Facility, 38000 Grenoble (France); oonmannix@gmail.com

<sup>5</sup> Biomaterials applications, 6 rue Lesdiguières, 38000 Grenoble (France); marguerite.rinaudo@sfr.fr

From figure 5: two videos for solutions in water and in 0.1M NaCl are available to download using the following dropbox links:

DNA 10 mg/mL H<sub>2</sub>O

<https://www.dropbox.com/s/f4h4p2zeul0svl3/ADN10gperLH2O.avi?dl=0>

DNA 10 mg/mL 0.1 M NaCl

<https://www.dropbox.com/s/z7gz1cf5baxpjr8/ADN10gpL01MNaCl.avi?dl=0>
